# Supplementary material
Source: ML conference proceedings conference paper supplement (https://proceedings.neurips.cc/paper_files/paper/2020/hash/adf854f418fc96fb01ad92a2ed2fc35c-Abstract.html)

(3.5, 5.0)

(3.5, 5.0)

(3.5, 3.4)

(3.5, 3.0)

(3.0, 3.0)

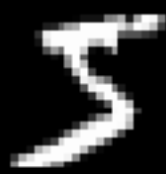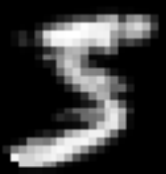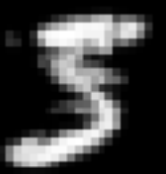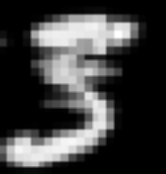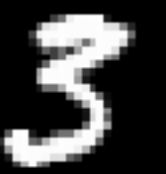

(9.0, 9.0)

(8.8, 8.6)

(8.2, 8.0)

(8.0, 8.0)

(8.0, 8.0)

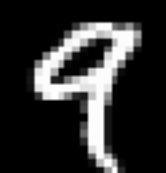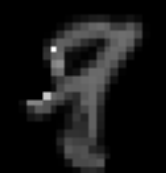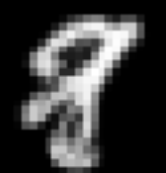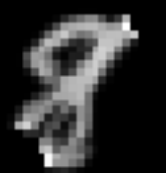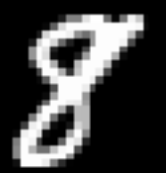

(2.2, 1.0)

(2.7, 3.4)

(3.5, 6.0)

(4.8, 6.0)

(6.0, 6.0)

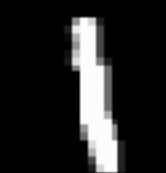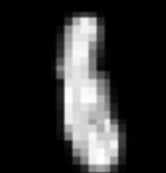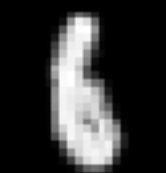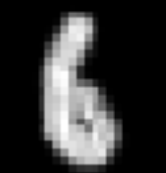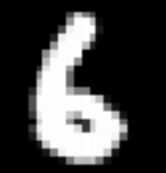

(6.5, 4.0)

(6.0, 4.0)

(6.0, 6.8)

(6.0, 9.0)

(8.5, 9.0)

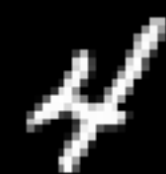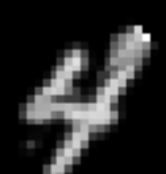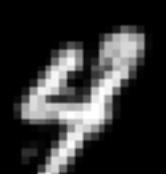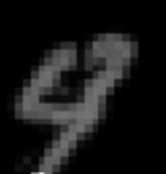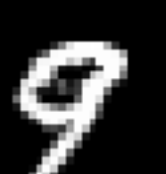

(3.0, 3.0)

(3.0, 3.0)

(4.2, 4.9)

(5.5, 8.0)

(8.0, 8.0)

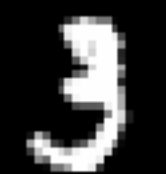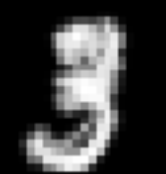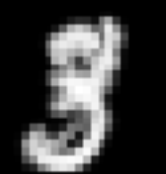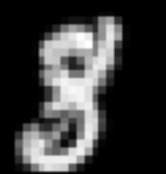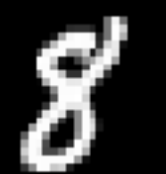

(2.3, 3.0)

(2.0, 3.0)

(1.5, 1.0)

(1.5, 0.7)

(0.0, 0.0)

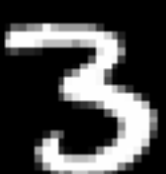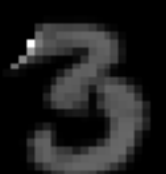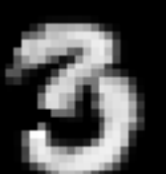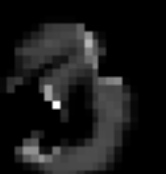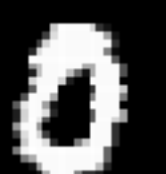

(2.2, 2.0)

(2.5, 2.5)

(2.5, 3.0)

(2.8, 3.0)

(2.8, 3.0)

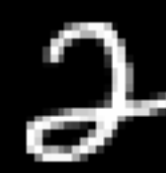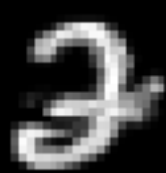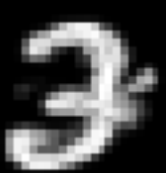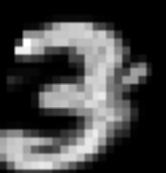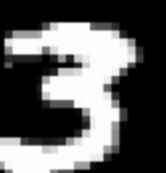

(6.0, 6.0)

(3.0, 3.9)

(3.0, 1.9)

(0.0, 0.0)

(0.0, 0.0)

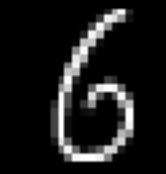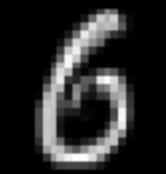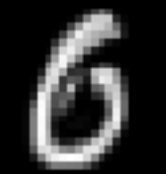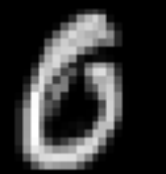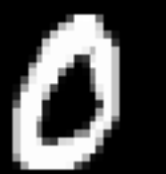

(8.8, 9.0)

(8.5, 9.0)

(8.2, 8.0)

(8.0, 8.0)

(8.0, 8.0)

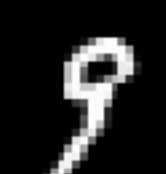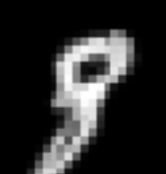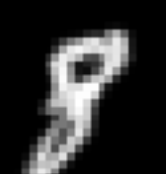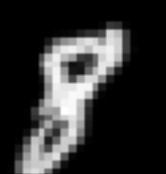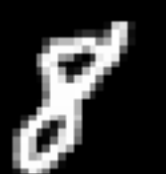

(0.0, 0.0)

(0.0, 0.0)

(0.7, 1.9)

(2.3, 3.0)

(2.8, 3.0)

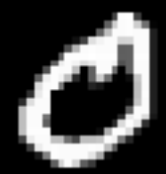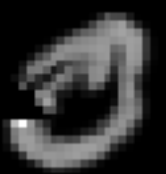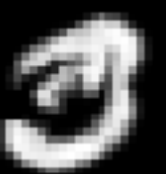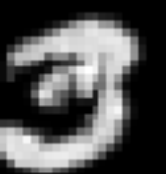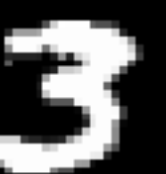

(9.0, 9.0)

(8.8, 9.0)

(8.2, 8.0)

(8.0, 8.0)

(8.0, 8.0)

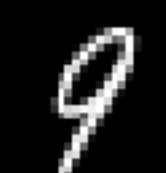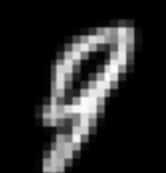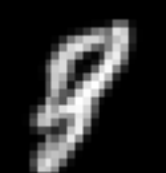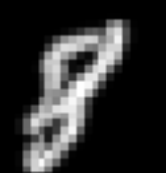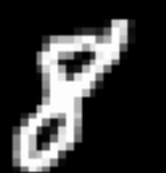

(2.5, 1.0)

(4.8, 1.0)

(4.8, 6.0)

(6.0, 6.0)

(6.0, 6.0)

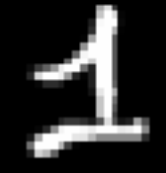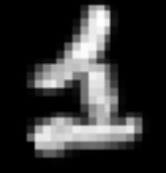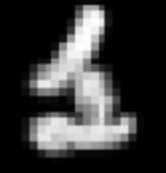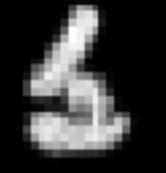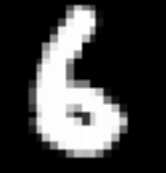

(1.2, 2.0)

(1.3, 2.0)

(1.8, 2.5)

(1.8, 3.0)

(2.8, 3.0)

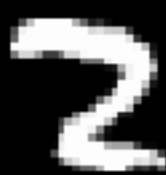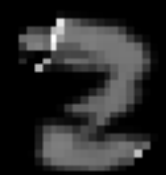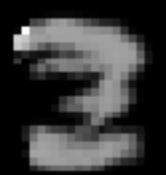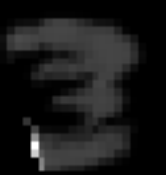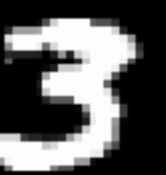

Supplement: Supplementary file [file adf854f418fc96fb01ad92a2ed2fc35c-Supplemental.zip]
