# Supplementary material
Source: ML conference proceedings conference paper supplement (https://proceedings.neurips.cc/paper_files/paper/2020/hash/adf854f418fc96fb01ad92a2ed2fc35c-Abstract.html)

(5.0, 5.0)

(5.3, 5.4)

(7.0, 8.0)

(7.6, 8.0)

(7.9, 8.0)

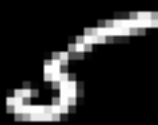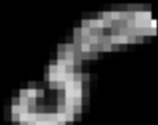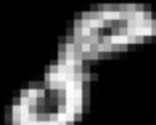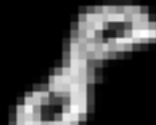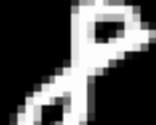

(6.0, 6.0)

(4.3, 6.0)

(2.0, 0.0)

(0.8, 0.0)

(0.1, 0.0)

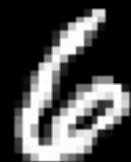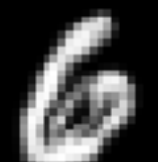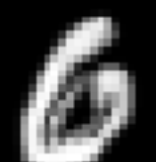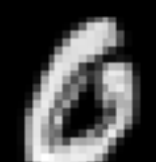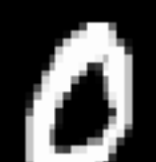

(7.0, 7.0)

(7.4, 7.0)

(7.9, 8.1)

(8.5, 9.0)

(8.9, 9.0)

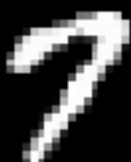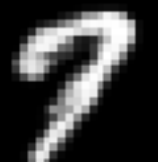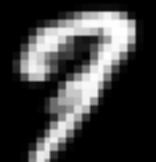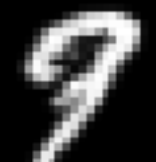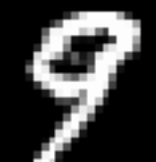

(8.0, 8.0)

(7.6, 8.0)

(7.6, 8.6)

(8.2, 9.0)

(8.9, 9.0)

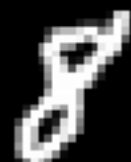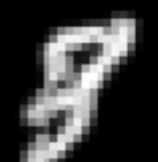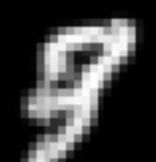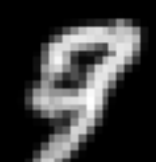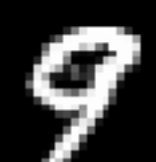

(9.0, 9.0)

(7.7, 9.0)

(3.9, 3.0)

(3.1, 3.0)

(3.0, 3.0)

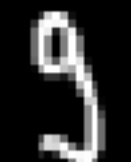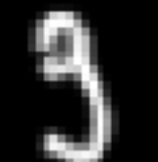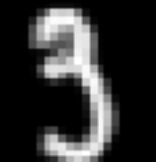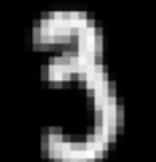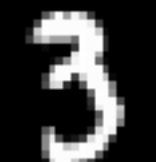

Supplement: Supplementary file [file adf854f418fc96fb01ad92a2ed2fc35c-Supplemental.zip]
