# Supplementary material
Source: ML conference proceedings conference paper supplement (https://proceedings.neurips.cc/paper_files/paper/2020/hash/adf854f418fc96fb01ad92a2ed2fc35c-Abstract.html)
Supplement: Supplementary file [file adf854f418fc96fb01ad92a2ed2fc35c-Supplemental.zip]

(0.0, 0.0)

(0.2, 0.0)

(0.6, 0.0)

(1.5, 2.0)

(3.0, 3.0)

(1.0, 1.0)

(1.2, 1.0)

(2.3, 1.9)

(3.8, 4.0)

(4.0, 4.0)

(2.0, 2.0)

(1.7, 2.0)

(1.0, 0.0)

(0.6, 0.0)

(0.2, 0.0)

(2.9, 3.0)

(2.7, 3.0)

(2.5, 2.7)

(2.3, 2.0)

(2.1, 2.0)

(4.0, 4.0)

(5.0, 4.0)

(8.6, 9.0)

(8.9, 9.0)

(9.0, 9.0)
