# Supplementary material
Source: ML conference proceedings conference paper supplement (https://proceedings.neurips.cc/paper_files/paper/2020/hash/adf854f418fc96fb01ad92a2ed2fc35c-Abstract.html)

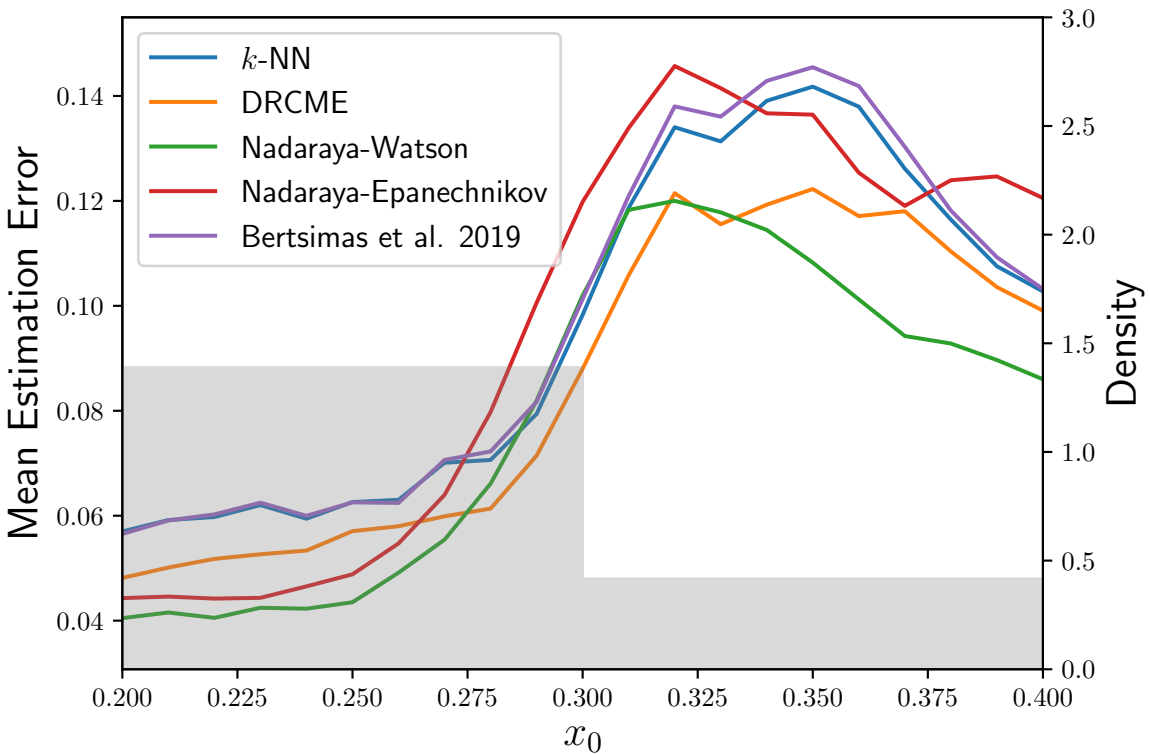

Supplement: Supplementary file [file adf854f418fc96fb01ad92a2ed2fc35c-Supplemental.zip]
