# Supplementary material
Source: ML conference proceedings conference paper supplement (https://proceedings.neurips.cc/paper_files/paper/2020/hash/adf854f418fc96fb01ad92a2ed2fc35c-Abstract.html)
Supplement: Supplementary file [file adf854f418fc96fb01ad92a2ed2fc35c-Supplemental.zip]

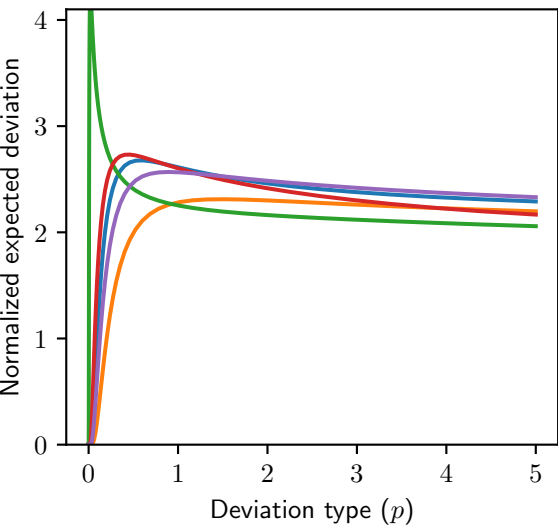

(a)  $N=50$

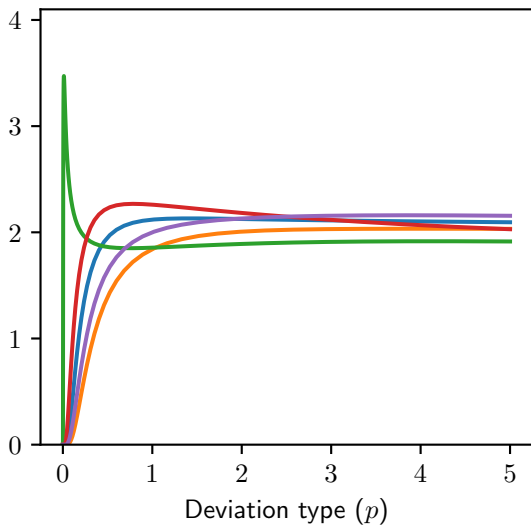

(b)  $N=100$

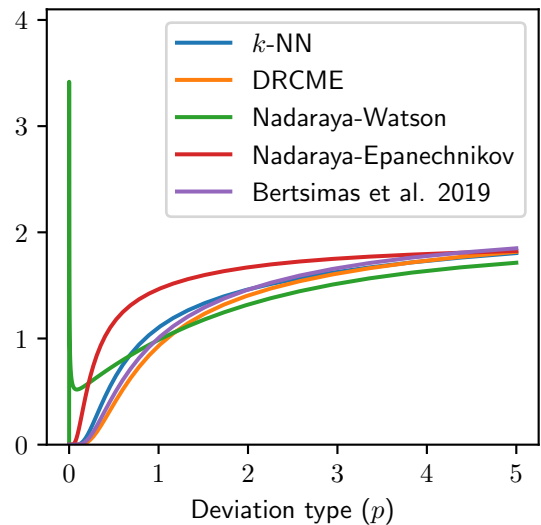

(c)  $N=500$
