# Supplementary material
Source: ML conference proceedings conference paper supplement (https://proceedings.neurips.cc/paper_files/paper/2020/hash/adf854f418fc96fb01ad92a2ed2fc35c-Abstract.html)
Supplement: Supplementary file [file adf854f418fc96fb01ad92a2ed2fc35c-Supplemental.zip]

---

# Appendix

## Distributionally Robust Local Non-parametric Conditional Estimation

---

Anonymous Author(s)

Affiliation

Address

email

### 1 A Additional Experiment Results

#### 2 A.1 Conditional Mean Estimation With Synthetic Data

3 We report in Figure A.1 the plot of mean estimation errors versus  $x_0$  for different training set sizes  
 4  $N = 50, 100, 200$ . In Figure A.2 we present the plot of the distribution of absolute estimation errors  
 5 for  $x_0 \in [0.28, 0.32]$ . For comparison, we also include the results of training set size  $N = 100$  that  
 6 are already reported in Figure 2 and 3. We remark that the estimation error of all the estimators  
 7 becomes smaller when training set size is larger, and DRCME has best estimation performance  
 8 among all the estimators around the jump point  $x = 0.3$  for all different training set sizes.

9 We report the hyper-parameters selected by cross-validation in Table A.1.

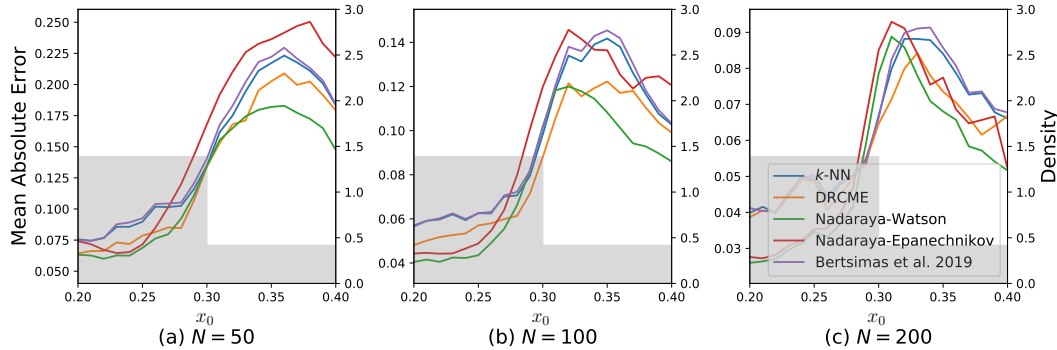

Figure A.1: Comparison of the mean absolute errors of conditional mean estimators for synthetic data under different training set sizes. The gray shade shows the density of  $X$ .

#### 10 A.2 Digit Estimation With MNIST Database

11 The distinction between N-W and DRCME is also apparent in Figure A.3 which presents the  
 12 normalized expected type- $p$  deviation of the estimation error for each estimator, i.e.  $\sqrt{2/p}(\mathbb{E}[|y - \hat{y}|^p])^{1/p}$ . Specifically, N-W slightly outperforms DRCME for deviation metrics of type  $p \geq 1$ , e.g.  
 13 with a root mean square error of 1.34 compared to 1.45 when  $N = 500$ . On the other hand, DRCME  
 14 significantly outperforms N-W when  $p < 1$  where high precision estimators are encouraged.  
 15

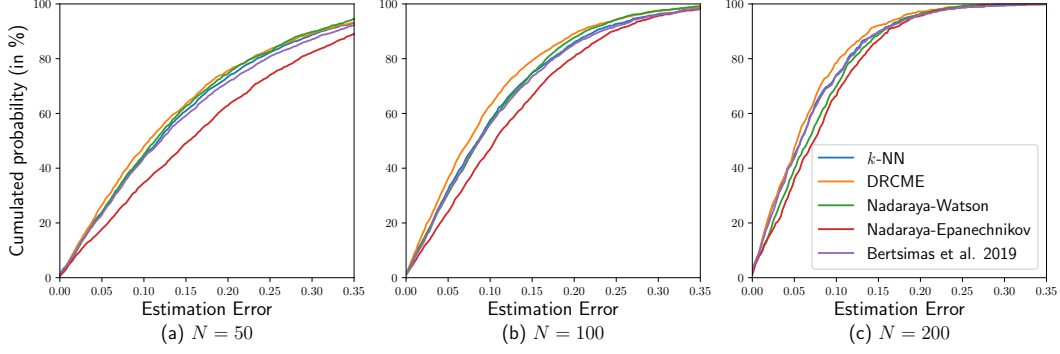

Figure A.2: Comparison of the distributions of absolute estimation errors of conditional mean estimators for synthetic data under different training set sizes.

| Method   | H.P.     | $N=50$              | $N=100$             | $N=200$             |
|----------|----------|---------------------|---------------------|---------------------|
| $k$ -NN  | $k$      | 1                   | 3                   | 5                   |
| N-W      | $h$      | 0.026               | 0.019               | 0.018               |
| N-E      | $h$      | 0.078               | 0.055               | 0.038               |
| BertEtAl | $k$      | 1                   | 3                   | 5                   |
|          | $\rho$   | 0.063               | 0.016               | 0.000               |
| DRCME    | $\gamma$ | $h_1^\gamma(\cdot)$ | $h_2^\gamma(\cdot)$ | $h_3^\gamma(\cdot)$ |
|          | $\rho$   | $0.031\gamma$       | $0.063\gamma$       | $0.063\gamma$       |

Table A.1: Median of hyper-parameters (H.P.) for synthetic data experiment obtained with cross-validation.

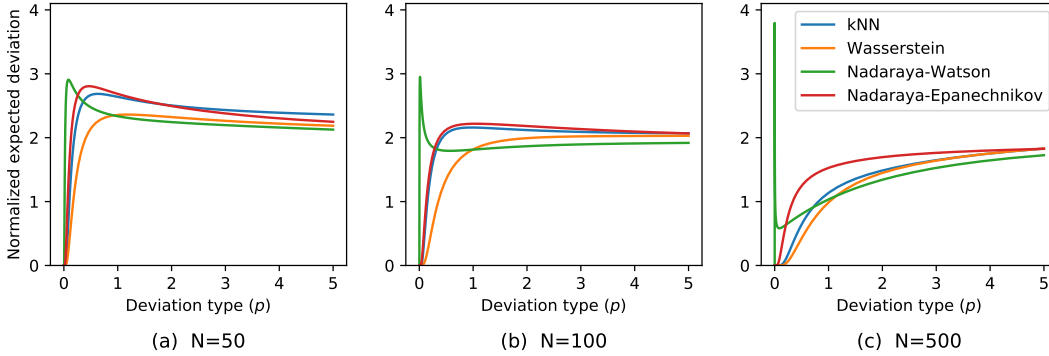

Figure A.3: Comparison of normalized expected type- $p$  deviation of the out-of-sample error of four non-parametric conditional mean estimation methods for the MNIST database under different training set sizes. E.g., at  $p = 2$  is presented the root-mean square error.

16 We also include in Figure A.4 some additional examples of labels from DRCME and N-W. On the  
17 other hand, Figure A.5 compares the labels from DRCME and BertEtAl .

## 18 B Proofs

19 This section contains the proofs of all technical results presented in the main paper.

### 20 B.1 Proofs of Section 2

21 *Proof of Proposition 2.2.* Using the definition of the type- $\infty$  Wasserstein distance, we can re-express  
22 the ambiguity set  $\mathbb{B}_\rho^\infty$  as

$$\begin{aligned} \mathbb{B}_\rho^\infty &= \left\{ \mathbb{Q} \in \mathcal{M}(\mathcal{X} \times \mathcal{Y}) : \begin{array}{l} \exists \pi \in \Pi(\mathbb{Q}, \hat{\mathbb{P}}) \text{ such that} \\ \text{ess sup}_\pi \{ \mathbb{D}_\mathcal{X}(x, x') + \mathbb{D}_\mathcal{Y}(y, y') \} \leq \rho \end{array} \right\} \\ &= \left\{ \mathbb{Q} \in \mathcal{M}(\mathcal{X} \times \mathcal{Y}) : \begin{array}{l} \exists \pi_i \in \mathcal{M}(\mathcal{X} \times \mathcal{Y}) \forall i \in [N] \text{ such that } \mathbb{Q} = \frac{1}{N} \sum_{i \in [N]} \pi_i \\ \text{ess sup}_{\frac{1}{N} \sum_{i \in [N]} \pi_i \otimes \delta_{(\hat{x}_i, \hat{y}_i)}} \{ \mathbb{D}_\mathcal{X}(x, x') + \mathbb{D}_\mathcal{Y}(y, y') \} \leq \rho \end{array} \right\}, \end{aligned}$$

23 where in the second equality we exploit the fact that  $\hat{\mathbb{P}}$  is an empirical measure and thus any joint  
24 probability measure  $\pi \in \Pi(\mathbb{Q}, \hat{\mathbb{P}})$  can be written as  $\pi = N^{-1} \sum_{i \in [N]} \pi_i \otimes \delta_{(\hat{x}_i, \hat{y}_i)}$ , where each  $\pi_i$  is  
25 a probability measure supported on  $\mathcal{X} \times \mathcal{Y}$ . The last constraint can now be written as

$$\mathbb{D}_\mathcal{X}(x, \hat{x}_i) + \mathbb{D}_\mathcal{Y}(y, \hat{y}_i) \leq \rho \quad \forall (x, y) \in \text{supp}(\pi_i) \quad \forall i \in [N],$$

26 where  $\text{supp}(\pi_i)$  denotes the support of the probability measure  $\pi_i$  [1, Page 441]. We thus have

$$\mathbb{B}_\rho^\infty = \left\{ \mathbb{Q} \in \mathcal{M}(\mathcal{X} \times \mathcal{Y}) : \begin{array}{l} \exists \pi_i \in \mathcal{M}(\mathcal{X} \times \mathcal{Y}) \forall i \in [N] \text{ such that } \mathbb{Q} = \frac{1}{N} \sum_{i \in [N]} \pi_i \\ \mathbb{D}_\mathcal{X}(x, \hat{x}_i) + \mathbb{D}_\mathcal{Y}(y, \hat{y}_i) \leq \rho \quad \forall (x, y) \in \text{supp}(\pi_i) \quad \forall i \in [N] \end{array} \right\}.$$

27 Suppose that  $\rho < \min_{i \in [N]} \kappa_{i, \gamma}$ , then this implies by the last constraint of the feasible set that  
28  $\pi_i(\mathcal{N}_\gamma(x_0) \times \mathcal{Y}) = 0$  for all  $i \in [N]$ . As a consequence, any  $\mathbb{Q} \in \mathbb{B}_\rho^\infty$  should satisfy

$$\mathbb{Q}(X \in \mathcal{N}_\gamma(x_0)) = \sum_{i \in [N]} \pi_i(\mathcal{N}_\gamma(x_0) \times \mathcal{Y}) = 0.$$

29 Hence  $\mathbb{B}_\rho^\infty \cap \{ \mathbb{Q} \in \mathcal{M}(\mathcal{X} \times \mathcal{Y}) : \mathbb{Q}(X \in \mathcal{N}_\gamma(x_0)) > 0 \} = \emptyset$ .

30 Suppose on the contrary that  $\rho \geq \min_{i \in [N]} \kappa_{i, \gamma}$ . Let  $i^* = \arg \min_{i \in [N]} \kappa_{i, \gamma}$ , and consider the  
31 following set of probability measures

$$\forall i \in [N] : \quad \pi_i = \begin{cases} \delta_{(\hat{x}_i^p, \hat{y}_i)} & \text{if } i = i^*, \\ \delta_{(\hat{x}_i, \hat{y}_i)} & \text{otherwise,} \end{cases}$$

32 and set  $\mathbb{Q} = \frac{1}{N} \sum_{i \in [N]} \pi_i$ . It is easy to verify that  $\mathbb{Q} \in \mathbb{B}_\rho^\infty$ , and that

$$\mathbb{Q}(X \in \mathcal{N}_\gamma(x_0)) \geq \frac{1}{N} \pi_{i^*}(X \in \mathcal{N}_\gamma(x_0)) = \frac{1}{N} > 0.$$

33 This observation completes the proof. □

34 The proof of Theorem 2.3 relies on the following result.

35 **Lemma B.1** (Optimal solution of a fractional linear program). Let  $d$  be a strictly positive integer.  
36 The linear fractional program

$$\min \left\{ \frac{c + \sum_{i=1}^K v_i \alpha_i}{d + \sum_{i=1}^K \alpha_i} : \alpha \in [0, 1]^K \right\}$$

37 admits the optimal solution

$$\forall i \in [K] : \quad \alpha_i^* = \begin{cases} 1 & \text{if } v_i > \frac{c + \sum_{j: v_j > v_i} v_j}{d + |\{j : v_j > v_i\}|}, \\ 0 & \text{otherwise.} \end{cases}$$

38 *Proof of Lemma B.1.* Without loss of generality assume that  $v_i$  are ordered decreasingly. Because  
 39 the objective function is pseudolinear, the optimal solution is at some binary vertex [6, Lemma 3.3].  
 40 Consider the equivalent problem

$$\max_{k, \alpha} \left\{ \frac{c + \sum_{i=1}^K v_i \alpha_i}{d + \sum_{i=1}^K \alpha_i} : \alpha \in \{0, 1\}^K, \sum_{i=1}^K \alpha_i = k, k \in [K] \right\}.$$

41 For any value  $k \in [K]$ , the corresponding optimal value of  $\alpha$  dependent on  $k$  is

$$\alpha_i^*(k) = \begin{cases} 1 & \text{if } i \leq k, \\ 0 & \text{otherwise,} \end{cases}$$

42 where we exploit the fact that  $v_i$  are ordered decreasingly. The above optimization problem can be  
 43 simplified to

$$\max_k \left\{ \frac{c + \sum_{i=1}^k v_i}{d + k} : k \in [K] \right\}. \quad (\text{A.1})$$

44 Now we need to show that the objective function  $g(k) \triangleq (c + \sum_{i=1}^k v_i)/(d + k)$  becomes non-  
 45 increasing once it starts decreasing. Indeed, the incremental improvement in the objective value  
 46 of (A.1) at  $k$  can be written as

$$\begin{aligned} \Delta_g(k) &= g(k+1) - g(k) = \frac{c + \sum_{i=1}^{k+1} v_i}{d + k + 1} - g(k) \\ &= \frac{(d + k)g(k) + v_{k+1}}{d + k + 1} - g(k) \\ &= \frac{v_{k+1} - g(k)}{d + k + 1}. \end{aligned}$$

47 If  $\Delta_g(k) < 0$ , this implies that  $v_{k+1} < g(k)$ . We also know that  $v_{k+2} \leq v_{k+1}$ . So we can show that:

$$\begin{aligned} \Delta_g(k+1) &= g(k+2) - g(k+1) = \frac{v_{k+2} - g(k+1)}{d + k + 2} \\ &= \frac{(d + k + 1)v_{k+2} - (d + k)g(k) - v_{k+1}}{(d + k + 2)(d + k + 1)} \\ &\leq \frac{(d + k + 1)v_{k+1} - (d + k)g(k) - v_{k+1}}{(d + k + 2)(d + k + 1)} \\ &= \frac{(d + k)(v_{k+1} - g(k))}{(d + k + 2)(d + k + 1)} < 0. \end{aligned}$$

48 Moreover, the above line of arguments also reveals that if  $v_{k+2} = v_{k+1}$  then both  $\Delta_g(k)$  and  
 49  $\Delta_g(k+1)$  have the same sign. Thus, the value  $k^*$  that maximizes (A.1) is also the solution of

$$\max\{k : \Delta_g(k-1) \geq 0\}.$$

50 Leveraging on the formula of  $\alpha_i^*(k)$ , the solution  $\alpha^*$  of the original fractional linear program has the  
 51 form

$$\begin{aligned} \forall i : \quad \alpha_i^* &= \begin{cases} 1 & \text{if } v_i > \frac{c + \sum_{j:j < i} v_j}{d + |\{j : j < i\}|}, \\ 0 & \text{otherwise,} \end{cases} \\ &= \begin{cases} 1 & \text{if } v_i > \frac{c + \sum_{j:v_j > v_i} v_j}{d + |\{j : v_j > v_i\}|}, \\ 0 & \text{otherwise,} \end{cases} \end{aligned}$$

52 where the second equality comes from the ordering of  $v_i$ . This observation completes the proof.  $\square$

53 *Proof of Theorem 2.3.* A conditional measure  $\mu_0$  of  $Y$  given  $X \in \mathcal{N}_\gamma(x_0)$  induced by a probability  
 54 measure  $\mathbb{Q}$  satisfying  $\mathbb{Q}(X \in \mathcal{N}_\gamma(x_0)) > 0$  can be written as

$$\mathbb{Q}(\mathcal{N}_\gamma(x_0) \times A) = \mu_0(A) \mathbb{Q}(\mathcal{N}_\gamma(x_0) \times \mathcal{Y}) \quad \forall A \subseteq \mathcal{Y} \text{ measurable.}$$

55 One can rewrite the worst-case conditional expected loss  $f(\beta)$  as

$$f(\beta) = \begin{cases} \sup & \int_{\mathcal{Y}} \ell(y, \beta) \mu_0(dy) \\ \text{s. t.} & \mathbb{Q} \in \mathbb{B}_{\rho}^{\infty}, \mathbb{Q}(\mathcal{N}_{\gamma}(x_0) \times \mathcal{Y}) > 0 \\ & \mathbb{Q}(\mathcal{N}_{\gamma}(x_0) \times A) = \mu_0(A) \mathbb{Q}(\mathcal{N}_{\gamma}(x_0) \times \mathcal{Y}) \quad \forall A \subseteq \mathcal{Y} \text{ measurable.} \end{cases}$$

56 By decomposing the measure  $\mathbb{Q}$  using the set of probability measures  $\pi_i$  and exploiting the definition  
57 of the type- $\infty$  Wasserstein distance as in the proof of Proposition 2.2, we have

$$f(\beta) = \begin{cases} \sup & \int_{\mathcal{Y}} \ell(y, \beta) \mu_0(dy) \\ \text{s. t.} & \mu_0 \in \mathcal{M}(\mathcal{Y}), \pi_i \in \mathcal{M}(\mathcal{X} \times \mathcal{Y}) \quad \forall i \in [N] \\ & \sum_{i \in [N]} \pi_i(\mathcal{N}_{\gamma}(x_0) \times \mathcal{Y}) > 0 \\ & \sum_{i \in [N]} \pi_i(\mathcal{N}_{\gamma}(x_0) \times A) = \mu_0(A) \sum_{i \in [N]} \pi_i(\mathcal{N}_{\gamma}(x_0) \times \mathcal{Y}) \quad \forall A \subseteq \mathcal{Y} \text{ measurable} \\ & \mathbb{D}_{\mathcal{X}}(x, \hat{x}_i) + \mathbb{D}_{\mathcal{Y}}(y, \hat{y}_i) \leq \rho \quad \forall (x, y) \in \text{supp}(\pi_i) \quad \forall i \in [N]. \end{cases}$$

58 For any set of feasible solutions  $\{\pi_i\}_{i \in [N]}$ , we have  $\sum_{i \in [N]} \pi_i(\mathcal{N}_{\gamma}(x_0) \times \mathcal{Y}) > 0$ . We can thus  
59 re-express  $\mu_0(A)$  for any Borel measurable set  $A \subseteq \mathcal{Y}$  as

$$\mu_0(A) = \frac{\sum_{i \in [N]} \pi_i(\mathcal{N}_{\gamma}(x_0) \times A)}{\sum_{i \in [N]} \pi_i(\mathcal{N}_{\gamma}(x_0) \times \mathcal{Y})} \quad \forall A \subseteq \mathcal{Y} \text{ measurable.}$$

60 Thus, we can eliminate the variables  $\mu_0$  from the above optimization problem to obtain the equivalent  
61 representation

$$f(\beta) = \begin{cases} \sup & \frac{1}{\sum_{i \in [N]} \pi_i(\mathcal{N}_{\gamma}(x_0) \times \mathcal{Y})} \sum_{i \in [N]} \int_{\mathcal{Y}} \ell(y, \beta) \pi_i(\mathcal{N}_{\gamma}(x_0) \times dy) \\ \text{s. t.} & \pi_i \in \mathcal{M}(\mathcal{X} \times \mathcal{Y}) \quad \forall i \in [N] \\ & \mathbb{D}_{\mathcal{X}}(x, \hat{x}_i) + \mathbb{D}_{\mathcal{Y}}(y, \hat{y}_i) \leq \rho \quad \forall (x, y) \in \text{supp}(\pi_i) \quad \forall i \in [N] \\ & \sum_{i \in [N]} \pi_i(\mathcal{N}_{\gamma}(x_0) \times \mathcal{Y}) > 0. \end{cases} \quad (\text{A.2})$$

62 We now show that problem (A.2) now can be written as

$$f(\beta) = \begin{cases} \sup & \frac{1}{\sum_{i \in [N]} \alpha_i} \sum_{i \in [N]} \alpha_i v_i^*(\beta) \\ \text{s. t.} & \alpha \in [0, 1]^N \\ & \alpha_i = 1 \text{ if } \mathbb{D}_{\mathcal{X}}(x_0, \hat{x}_i) + \rho \leq \gamma \\ & \alpha_i = 0 \text{ if } \mathbb{D}_{\mathcal{X}}(x_0, \hat{x}_i) > \rho + \gamma \\ & \sum_{i \in [N]} \alpha_i > 0, \end{cases} \quad (\text{A.3})$$

63 where the value  $v_i^*(\beta)$  is calculated as

$$v_i^*(\beta) = \sup \{ \ell(y_i, \beta) : y_i \in \mathcal{Y}, \mathbb{D}_{\mathcal{Y}}(y_i, \hat{y}_i) \leq \rho - \mathbb{D}_{\mathcal{X}}(\hat{x}_i^p, \hat{x}_i) \}.$$

64 The equivalence between the supremum problems (A.2) and (A.3) can be shown in two steps. First,  
65 for (A.2)  $\leq$  (A.3), given any feasible solution of (A.2), one can construct a feasible solution of (A.3)  
66 using  $\alpha_i = \pi_i(\mathcal{N}_{\gamma}(x_0) \times \mathcal{Y})$ . For this candidate we have

$$\frac{\sum_{i \in [N]} \int_{\mathcal{Y}} \ell(y, \beta) \pi_i(\mathcal{N}_{\gamma}(x_0) \times dy)}{\sum_{i \in [N]} \pi_i(\mathcal{N}_{\gamma}(x_0) \times \mathcal{Y})} \leq \frac{\sum_{i \in [N]} \alpha_i \ell(y_i^*, \beta)}{\sum_{i \in [N]} \alpha_i}.$$

67 Alternatively, given a feasible solution for (A.3), one can construct the following feasible solution for  
68 (A.2): for any  $\epsilon > 0$ , let  $y_i^{\epsilon} \in \mathcal{Y}$  be such that  $\mathbb{D}_{\mathcal{Y}}(y_i^{\epsilon}, \hat{y}_i) \leq \rho - \mathbb{D}_{\mathcal{X}}(x_0, \hat{x}_i)$  and  $\ell(y_i^{\epsilon}, \beta) \geq v_i^*(\beta) - \epsilon$ ,  
69 and let

$$\forall i \in [N] : \quad \pi_i^{\epsilon} = \begin{cases} \delta_{(\hat{x}_i^p, y_i^{\epsilon})} & \text{if } \mathbb{D}_{\mathcal{X}}(x_0, \hat{x}_i) + \rho \leq \gamma, \\ \alpha_i \delta_{(\hat{x}_i^p, y_i^{\epsilon})} + (1 - \alpha_i) \delta_{(x_i^r, \hat{y}_i)} & \text{if } \mathbb{D}_{\mathcal{X}}(x_0, \hat{x}_i) > \rho + \gamma, \\ \delta_{(\hat{x}_i, \hat{y}_i)} & \text{otherwise,} \end{cases}$$

70 where  $x_i^r$  is any point such that  $\mathbb{D}_{\mathcal{X}}(x_i^r, \hat{x}_i) \leq \rho$  and  $x_i^r \notin \mathcal{N}_{\gamma}(x_0)$ . Again, this candidate is feasible  
 71 in (A.2) and we have that

$$\begin{aligned} f(\beta) &\geq \sup_{\epsilon > 0} \frac{\sum_{i \in [N]} \int_{\mathcal{Y}} \ell(y, \beta) \pi_i^{\epsilon}(\mathcal{N}_{\gamma}(x_0) \times \mathcal{Y}) \, dy}{\sum_{i \in [N]} \pi_i^{\epsilon}(\mathcal{N}_{\gamma}(x_0) \times \mathcal{Y})} \\ &\geq \sup_{\epsilon > 0} \frac{\sum_{i \in [N]} \alpha_i (\ell(y_i^*, \beta) - \epsilon)}{\sum_{i \in [N]} \alpha_i} \\ &= \frac{\sum_{i \in [N]} \alpha_i \ell(y_i^*, \beta)}{\sum_{i \in [N]} \alpha_i} = \frac{\sum_{i \in [N]} \alpha_i v_i^*(\beta)}{\sum_{i \in [N]} \alpha_i} \end{aligned}$$

72 Let  $\mathcal{I}$  and  $\mathcal{I}_1$  be the index sets defined as in (4a)-(4b), the value  $f(\beta)$  is equal to the optimal value of  
 73 a fractional linear program

$$f(\beta) = \max \left\{ \frac{\sum_{i \in \mathcal{I}} v_i^*(\beta) \alpha_i}{\sum_{i \in \mathcal{I}} \alpha_i} : \alpha \in [0, 1]^N, \alpha_i = 1 \, \forall i \in \mathcal{I}_1, \sum_{i \in \mathcal{I}} \alpha_i > 0 \right\} \quad (\text{A.4a})$$

$$= \max \left\{ \frac{\sum_{i \in \mathcal{I}_1} v_i^*(\beta) + \sum_{i \in \mathcal{I}_2} v_i^*(\beta) \alpha_i}{|\mathcal{I}_1| + \sum_{i \in \mathcal{I}_2} \alpha_i} : \alpha \in [0, 1]^N, \alpha_i = 1 \, \forall i \in \mathcal{I}_1, |\mathcal{I}_1| + \sum_{i \in \mathcal{I}_2} \alpha_i > 0 \right\}. \quad (\text{A.4b})$$

74 Notice that the objective function and the constraints of (A.4b) depend only on  $\alpha_i$  for  $i \in \mathcal{I}$ . Suppose  
 75 that  $\mathcal{I}_1 \neq \emptyset$ , Lemma B.1 indicates that the optimal solution  $\alpha^*$  that solves (A.4b) is

$$\forall i \in \mathcal{I} : \quad \alpha_i^* = \begin{cases} 1 & \text{if } i \in \mathcal{I}_1, \\ 1 & \text{if } v_i^*(\beta) > \frac{\sum_{i \in \mathcal{I}_1} v_i^*(\beta) + \sum_{j: v_j^*(\beta) > v_i^*(\beta)} v_j^*(\beta)}{|\mathcal{I}_1| + |\{j : v_j^*(\beta) > v_i^*(\beta)\}|}, \\ 0 & \text{otherwise.} \end{cases} \quad (\text{A.5})$$

76 Suppose that  $\mathcal{I}_1 = \emptyset$ , then the optimal solution of problem (A.4b) is

$$\forall i \in \mathcal{I} : \quad \alpha_i^* = \begin{cases} 1 & \text{if } v_i^*(\beta) \geq \max_{j \in \mathcal{I}_2} v_j^*(\beta), \\ 0 & \text{otherwise.} \end{cases}$$

77 Combining the above two cases, we can rewrite the optimal value of  $\alpha$  that solves (A.4b) as in the  
 78 statement of the theorem. This completes the proof.  $\square$

79 *Proof of Corollary 2.4.* Because  $\mathbb{D}_{\mathcal{Y}}$  is an absolute distance, we have

$$\{y_i \in \mathcal{Y} : |y_i - \hat{y}_i| \leq \rho - \mathbb{D}_{\mathcal{X}}(\hat{x}_i^p, \hat{x}_i)\} = [\max\{a, \hat{y}_i - \rho + \mathbb{D}_{\mathcal{X}}(\hat{x}_i^p, \hat{x}_i)\}, \min\{b, \hat{y}_i + \rho - \mathbb{D}_{\mathcal{X}}(\hat{x}_i^p, \hat{x}_i)\}],$$

80 where the equality follows from  $\mathcal{Y} = [a, b]$ . Because both the  $\|\cdot\|_2^2$  and the quantile loss functions are  
 81 convex, the value  $v_i^*(\beta)$  is thus attained at the extreme points of the interval. Calculating the value of  
 82  $\ell(\cdot, \beta)$  at these two endpoints and taking the maximum between them completes the proof.  $\square$

83 Before proving Proposition 2.5, we need the following two results which asserts the analytical optimal  
 84 value of maximizing a convex quadratic functions over a norm ball. These results can be found in the  
 85 literature, the proof is included here for completeness.

86 **Lemma B.2** (Convex quadratic maximization over a norm ball). For any  $\beta \in \mathbb{R}^m$ ,  $\hat{y} \in \mathbb{R}^m$  and  
 87  $r \in \mathbb{R}_+$ , the following assertions hold.

88 (i) Over a  $\|\cdot\|_2$  ball, we have

$$\sup \{ \|y - \beta\|_2^2 : \|y - \hat{y}\|_2^2 \leq r^2 \} = (r + \|\hat{y} - \beta\|_2)^2.$$

89 (ii) Over a  $\|\cdot\|_{\infty}$  ball, we have

$$\sup \{ \|y - \beta\|_2^2 : \|y - \hat{y}\|_{\infty} \leq r \} = \sum_{j \in [m]} \max \{ (\hat{y}_j - \beta_j - r)^2, (\hat{y}_j - \beta_j + r)^2 \},$$

90 where  $\beta_j$  and  $\hat{y}_j$  denote the  $j$ -th element of the vector  $\beta$  and  $\hat{y}$ , respectively.

91 *Proof of Lemma B.2.* We first prove Assertion (i). First, the optimal value is upper bounded by  
 92  $(r + \|\hat{y} - \beta\|_2)^2$  because

$$\|y - \beta\|_2 \leq \|y - \hat{y}\|_2 + \|\hat{y} - \beta\|_2 \leq r + \|\hat{y} - \beta\|_2$$

93 by triangle inequality. Yet, it is equal to that amount since that amount is attained when  $y =$   
 94  $\hat{y} + r(\hat{y} - \beta)/\|\hat{y} - \beta\|_2$ .

95 Consider now Assertion (ii). Using a change of variables  $z \leftarrow y - \beta$  and a change of parameters  
 96  $w \leftarrow \hat{y} - \beta$ , we find

$$\sup \{ \|y - \beta\|_2^2 : \|y - \hat{y}\|_\infty \leq r \} = \max \{ \|z\|_2^2 : \|z - w\|_\infty \leq r \}, \quad (\text{A.6})$$

97 where the maximization operators are justified by Weierstrass' maximum value theorem [1, Theo-  
 98 rem 2.43] because the feasible set is compact and the objective function is continuous. By extending  
 99 the norm constraint into the vector form, we have the equivalence

$$\max \{ \|z\|_2^2 : w - r\mathbb{1}_m \leq z \leq w + r\mathbb{1}_m \},$$

100 where the inequalities in the constraints are understood as element-wise inequalities, and  $\mathbb{1}_m$  is an  
 101  $m$ -dimensional vector of ones. This maximization problem is separable in the decision variables and  
 102 can be decomposed into  $m$  independent univariate subproblems of the form

$$\max \{ z_j^2 : w_j - r \leq z_j \leq w_j + r \}$$

103 for each  $j \in [m]$ . It is easy to verify that the optimal value of each univariate subproblem is equal to

$$\max \{ (w_j - r)^2, (w_j + r)^2 \},$$

104 and summing up the optimal values over  $j$  completes the proof.  $\square$

105 We are now ready to prove Proposition 2.5.

106 *Proof of Proposition 2.5.* Following from equation (A.4a) in the proof of Theorem 2.3, we have

$$f(\beta) = \max \left\{ \frac{\sum_{i \in \mathcal{I}} v_i^*(\beta) \alpha_i}{\sum_{i \in \mathcal{I}} \alpha_i} : \alpha \in [0, 1]^N, \alpha_i = 1 \forall i \in \mathcal{I}_1, \sum_{i \in \mathcal{I}} \alpha_i > 0 \right\}$$

107 By applying the Charnes-Cooper transformation [4] with

$$z_i = \frac{\alpha_i}{\sum_{i \in \mathcal{I}} \alpha_i}, \quad \text{and} \quad t = \frac{1}{\sum_{i \in \mathcal{I}} \alpha_i}$$

108 to reformulate this fractional linear problem, we have

$$\begin{aligned} f(\beta) &= \begin{cases} \max & \sum_{i \in \mathcal{I}} v_i^*(\beta) z_i \\ \text{s. t.} & \sum_{i \in \mathcal{I}} z_i = 1, t \geq 0 \\ & z_i - t = 0 \quad \forall i \in \mathcal{I}_1 \\ & 0 \leq z_i \leq t \quad \forall i \in \mathcal{I}_2. \end{cases} \\ &= \begin{cases} \min & \lambda \\ \text{s. t.} & \lambda \in \mathbb{R}, u_i \in \mathbb{R} \forall i \in \mathcal{I}_1, u_i \in \mathbb{R}_+ \forall i \in \mathcal{I}_2 \\ & \lambda + u_i \geq v_i^*(\beta) \quad \forall i \in \mathcal{I} \\ & \sum_{i \in \mathcal{I}} u_i \leq 0, \end{cases} \end{aligned}$$

109 where the second equality follows from linear programming duality. Using the last minimization  
 110 reformulation of  $f(\beta)$ , problem (2) is now equivalent to

$$\min_{\beta} f(\beta) = \begin{cases} \min & \lambda \\ \text{s. t.} & \beta \in \mathbb{R}^m, \lambda \in \mathbb{R}, u_i \in \mathbb{R} \forall i \in \mathcal{I}_1, u_i \in \mathbb{R}_+ \forall i \in \mathcal{I}_2 \\ & \lambda + u_i \geq v_i^*(\beta) \quad \forall i \in \mathcal{I} \\ & \sum_{i \in \mathcal{I}} u_i \leq 0, \end{cases}$$

111 When  $\mathbb{D}_y$  is a 2-norm, each value  $v_i^*(\beta)$  calculated from (5) becomes

$$v_i^*(\beta) = \sup \{ \|y - \beta\|_2^2 : \|y - \hat{y}_i\|_2 \leq \rho - \mathbb{D}_{\mathcal{X}}(\hat{x}_i^p, \hat{x}_i) \} \quad \forall i \in [N].$$

112 For any  $i \in \mathcal{I}$ , the value  $v_i^*(\beta)$  is finite and  $v_i^*(\beta)$  can be re-expressed by exploiting Lemma B.2(i) as

$$v_i^*(\beta) = (\rho - \mathbb{D}_{\mathcal{X}}(\hat{x}_i^p, \hat{x}_i) + \|\hat{y}_i - \beta\|_2)^2.$$

113 Problem (2) is now equivalent to

$$\begin{aligned} \min \quad & \lambda \\ \text{s. t.} \quad & \beta \in \mathbb{R}^m, \lambda \in \mathbb{R}, u_i \in \mathbb{R} \forall i \in \mathcal{I}_1, u_i \in \mathbb{R}_+ \forall i \in \mathcal{I}_2 \\ & \lambda + u_i \geq (\rho - \mathbb{D}_{\mathcal{X}}(\hat{x}_i^p, \hat{x}_i) + \|\hat{y}_i - \beta\|_2)^2 \quad \forall i \in \mathcal{I} \\ & \sum_{i \in \mathcal{I}} u_i \leq 0. \end{aligned} \tag{A.7}$$

114 To obtain a second-order cone program formulation, it now suffices to add the hypergraph formulation  
115  $t_i \geq \|\hat{y}_i - \beta\|_2$  with  $t_i \geq 0$ , and reformulate the quadratic constraint into a second-order cone  
116 constraint using results from [2, Section 2]. This completes the proof for claim (i).

117 We now proceed to prove claim (ii). When  $\mathbb{D}_{\mathcal{Y}}$  is the  $\infty$ -norm, each value  $v_i^*(\beta)$  becomes

$$v_i^*(\beta) = \sup \{ \|y - \beta\|_2^2 : \|y - \hat{y}_i\|_{\infty} \leq \rho - \mathbb{D}_{\mathcal{X}}(\hat{x}_i^p, \hat{x}_i) \} \quad \forall i \in [N].$$

118 For any  $i \in \mathcal{I}$ , the value  $v_i^*(\beta)$  is finite and  $v_i^*(\beta)$  can be re-expressed using Lemma B.2(ii) as

$$v_i^*(\beta) = \sum_{j \in [m]} \max \{ (\hat{y}_{ij} - \beta_j - \rho + \mathbb{D}_{\mathcal{X}}(\hat{x}_i^p, \hat{x}_i))^2, (\hat{y}_{ij} - \beta_j + \rho - \mathbb{D}_{\mathcal{X}}(\hat{x}_i^p, \hat{x}_i))^2 \}.$$

119 By adding auxiliary variables  $T_{ij}$  with the constraints

$$(\hat{y}_{ij} - \beta_j - \rho + \mathbb{D}_{\mathcal{X}}(\hat{x}_i^p, \hat{x}_i))^2 \leq T_{ij}^2, \quad \text{and} \quad (\hat{y}_{ij} - \beta_j + \rho - \mathbb{D}_{\mathcal{X}}(\hat{x}_i^p, \hat{x}_i))^2 \leq T_{ij}^2,$$

120 problem (2) is now equivalent to

$$\begin{aligned} \min \quad & \lambda \\ \text{s. t.} \quad & \beta \in \mathbb{R}^m, \lambda \in \mathbb{R}, T \in \mathbb{R}_+^{|\mathcal{I}| \times m}, u_i \in \mathbb{R} \forall i \in \mathcal{I}_1, u_i \in \mathbb{R}_+ \forall i \in \mathcal{I}_2 \\ & \sum_{i \in \mathcal{I}} u_i \leq 0 \\ & \lambda + u_i \geq \sum_{j \in [m]} T_{ij}^2 \quad \forall i \in \mathcal{I} \\ & (\hat{y}_{ij} - \beta_j - \rho + \mathbb{D}_{\mathcal{X}}(\hat{x}_i^p, \hat{x}_i))^2 \leq T_{ij}^2 \quad \forall (i, j) \in \mathcal{I} \times [m] \\ & (\hat{y}_{ij} - \beta_j + \rho - \mathbb{D}_{\mathcal{X}}(\hat{x}_i^p, \hat{x}_i))^2 \leq T_{ij}^2 \quad \forall (i, j) \in \mathcal{I} \times [m]. \end{aligned}$$

121 The last two constraints can be re-expressed as linear constraints of the form

$$\begin{aligned} -T_{ij} &\leq \hat{y}_{ij} - \beta_j - \rho + \mathbb{D}_{\mathcal{X}}(\hat{x}_i^p, \hat{x}_i) \leq T_{ij} \quad \forall (i, j) \in \mathcal{I} \times [m] \\ -T_{ij} &\leq \hat{y}_{ij} - \beta_j + \rho - \mathbb{D}_{\mathcal{X}}(\hat{x}_i^p, \hat{x}_i) \leq T_{ij} \quad \forall (i, j) \in \mathcal{I} \times [m]. \end{aligned}$$

122 Formulating the quadratic constraint  $\lambda + u_i \geq \sum_{j \in [m]} T_{ij}^2$  using [2, Section 2] completes the  
123 proof.  $\square$

124 *Proof of Proposition 2.6.* For the purpose of this proof, define the following sets

$$\mathcal{Y}_i \triangleq \{y_i \in \mathcal{Y} : \mathbb{D}_{\mathcal{Y}}(y_i, \hat{y}_i) \leq \rho - \mathbb{D}_{\mathcal{X}}(\hat{x}_i^p, \hat{x}_i)\} \quad \forall i \in \mathcal{I}.$$

125 Because  $\mathbb{D}_{\mathcal{Y}}$  is coercive and continuous, each set  $\mathcal{Y}_i$  is compact. Because the loss function is  
126 continuous, there thus exists  $y_i^*$  satisfying  $y_i^* \in \mathcal{Y}_i$  and  $\ell(y_i^*, \beta) = v_i^*(\beta)$  for any  $i \in \mathcal{I}$ . Following  
127 from Equation (A.4a) in the proof of Theorem 2.3, we have

$$\begin{aligned} f(\beta) &= \max \left\{ \frac{\sum_{i \in \mathcal{I}} v_i^*(\beta) \alpha_i}{\sum_{i \in \mathcal{I}} \alpha_i} : \alpha \in [0, 1]^N, \alpha_i = 1 \forall i \in \mathcal{I}_1, \sum_{i \in \mathcal{I}} \alpha_i > 0 \right\} \\ &= \max \left\{ \frac{\sum_{i \in \mathcal{I}} \ell(y_i, \beta) \alpha_i}{\sum_{i \in \mathcal{I}} \alpha_i} : \alpha \in [0, 1]^N, \alpha_i = 1 \forall i \in \mathcal{I}_1, \sum_{i \in \mathcal{I}} \alpha_i > 0, y_i \in \mathcal{Y}_i \forall i \in \mathcal{I} \right\}. \end{aligned}$$

128 If  $\mathcal{I}_1 = \emptyset$ , then we have

$$f(\beta) = \ell(y_{i^*}, \beta) \quad \forall i^* \in \arg \max_{i \in \mathcal{I}_2} v_i^*(\beta),$$

129 and a subgradient of  $f$  is  $\partial f(\beta) = \partial_{\beta} \ell(y_{i^*}, \beta)$  for any  $i^* \in \arg \max_{i \in \mathcal{I}_2} v_i^*(\beta)$ . By incorporating  
130 the optimal value of  $\alpha$  in the statement of Theorem 2.3, we have  $\partial f(\beta) = \alpha_i \partial_{\beta} \ell(y_i^*, \beta)$ .



131 If  $\mathcal{I}_1 \neq \emptyset$ , then we have

$$\begin{aligned} f(\beta) &= \max \left\{ \frac{\sum_{i \in \mathcal{I}_1} v_i^*(\beta) + \sum_{i \in \mathcal{I}_2} v_i^*(\beta) \alpha_i}{|\mathcal{I}_1| + \sum_{i \in \mathcal{I}_2} \alpha_i} : \alpha \in [0, 1]^N, \alpha_i = 1 \forall i \in \mathcal{I}_1 \right\} \\ &= \max \left\{ \frac{\sum_{i \in \mathcal{I}_1} \ell(y_i, \beta) + \sum_{i \in \mathcal{I}_2} \ell(y_i, \beta) \alpha_i}{|\mathcal{I}_1| + \sum_{i \in \mathcal{I}_2} \alpha_i} : \alpha \in [0, 1]^N, \alpha_i = 1 \forall i \in \mathcal{I}_1, y_i \in \mathcal{Y}_i \forall i \in \mathcal{I} \right\} \end{aligned}$$

132 Notice that the function

$$\beta \mapsto \frac{\sum_{i \in \mathcal{I}_1} \ell(y_i, \beta) + \sum_{i \in \mathcal{I}_2} \ell(y_i, \beta) \alpha_i}{|\mathcal{I}_1| + \sum_{i \in \mathcal{I}_2} \alpha_i}$$

133 is convex for any feasible value of  $(\alpha, y)$  in the above optimization problem. Moreover, by Ty-  
 134 chonoff's theorem [1, Theorem 2.61], the feasible set of the above optimization problem is a compact  
 135 set in the product topology. One can now apply [3, Proposition A.22] to conclude that a subgradient  
 136 of  $f$  in this case is

$$\partial f(\beta) = \frac{\sum_{i \in \mathcal{I}_1} \partial_\beta \ell(y_i, \beta) + \sum_{i \in \mathcal{I}_2} \partial_\beta \ell(y_i, \beta) \alpha_i}{|\mathcal{I}_1| + \sum_{i \in \mathcal{I}_2} \alpha_i}.$$

137 Combining the two cases, we have the postulated result.  $\square$

## 138 B.2 Proofs of Section 3

139 *Proof of Proposition 3.1.* Under the conditions of the proposition, we have  $\mathbb{P}(X \in \mathcal{N}_\gamma(x_0)) > 0$   
 140 because  $\mathbb{P}$  admits a density, and that  $\mathcal{N}_\gamma(x_0) \cap \mathcal{X}$  is a set with non-empty interior for any  $\gamma > 0$ . The  
 141 proof now follows trivially from [5, Theorem 1.1]. Indeed, under the conditions of the proposition,  
 142 with probability of at least  $1 - O(N^{-c})$ , we have  $\mathbb{P} \in \mathbb{B}_\rho^\infty$ , and hence the bound follows.  $\square$

143 *Proof of Example 3.2.* For the purpose of this proof, we let  $\mathbb{P}^\infty = \mathbb{P} \otimes \mathbb{P} \otimes \dots$  be the joint distribution  
 144 of  $(\hat{x}_1, \hat{y}_1), (\hat{x}_2, \hat{y}_2), \dots$ . The selection of parameter  $\gamma = 0$  implies that  $\mathcal{I} = \mathcal{I}_2$ , and for any fixed  
 145  $\rho > 0$  we have  $\mathbb{P}^\infty(\lim_{N \rightarrow \infty} |\mathcal{I}| = +\infty) = 1$  by Borel-Cantelli lemma. In this example, the DRO  
 146 problem is feasible if  $\mathcal{I}$  is nonempty, and we have an explicit optimal solution

$$\beta_N^* = \frac{1}{2} \min_{i \in \mathcal{I}} \{\hat{y}_i - \rho + \mathbb{D}_{\mathcal{X}}(\hat{x}_i, x_0)\} + \frac{1}{2} \max_{i \in \mathcal{I}} \{\hat{y}_i + \rho - \mathbb{D}_{\mathcal{X}}(\hat{x}_i, x_0)\}$$

147 Notice that with probability 1 we have

$$\min_{i \in \mathcal{I}} \{\hat{y}_i - \rho + \mathbb{D}_{\mathcal{X}}(\hat{x}_i, x_0)\} \geq -\rho \text{ and } \max_{i \in \mathcal{I}} \{\hat{y}_i + \rho - \mathbb{D}_{\mathcal{X}}(\hat{x}_i, x_0)\} \geq \max_{i \in \mathcal{I}} \{\hat{y}_i\}.$$

148 Consequently we have  $\beta_N^* \geq \frac{1}{2} \max_{i \in \mathcal{I}} \{\hat{y}_i\} - \frac{1}{2} \rho$ . For all  $y > 0$ , we have

$$\begin{aligned} \mathbb{P}^\infty \left( \lim_{N \rightarrow \infty} \beta_N^* > y \right) &\geq \mathbb{P}^\infty \left( \lim_{N \rightarrow \infty} \max_{i \in \mathcal{I}} \{\hat{y}_i\} > 2y + \rho \right) = \lim_{N \rightarrow \infty} \mathbb{P}^\infty \left( \max_{i \in \mathcal{I}} \{\hat{y}_i\} > 2y + \rho \right) \\ &= \lim_{N \rightarrow \infty} 1 - \mathbb{P}(Y \leq 2y + \rho)^{|\mathcal{I}|} = 1. \end{aligned}$$

149 Let  $y$  tend to infinity concludes the proof.  $\square$

150 Before proving Proposition 3.4, we first present the following minimax result.

151 **Lemma B.3** (Minimax result). Suppose that  $\ell(y, \cdot)$  is convex and coercive for any  $y \in \mathcal{Y}$ , and that  
 152  $\mathbb{D}_{\mathcal{Y}}(\cdot, \hat{y})$  is convex and coercive for any  $\hat{y}$ . For any  $\rho \geq \min_{i \in [N]} \kappa_{i, \gamma}$ , we have

$$\begin{aligned} \min_{\beta \in \mathbb{R}^m} \sup_{\mathbb{Q} \in \mathbb{B}_\rho^\infty, \mathbb{Q}(X \in \mathcal{N}_\gamma(x_0)) > 0} \mathbb{E}_{\mathbb{Q}}[\ell(Y, \beta) | X \in \mathcal{N}_\gamma(x_0)] \\ = \sup_{\mathbb{Q} \in \mathbb{B}_\rho^\infty, \mathbb{Q}(X \in \mathcal{N}_\gamma(x_0)) > 0} \min_{\beta \in \mathbb{R}^m} \mathbb{E}_{\mathbb{Q}}[\ell(Y, \beta) | X \in \mathcal{N}_\gamma(x_0)]. \end{aligned}$$

153 To facilitate the proof of Lemma B.3, we define the following conditional ambiguity set induced by  
 154  $\mathbb{B}_\rho^\infty$  as

$$\mathcal{B}_{x_0, \gamma}(\mathbb{B}_\rho^\infty) \triangleq \left\{ \mu_0 \in \mathcal{M}(\mathcal{Y}) : \begin{array}{l} \exists \mathbb{Q} \in \mathbb{B}_\rho^\infty, \mathbb{Q}(\mathcal{N}_\gamma(x_0) \times \mathcal{Y}) > 0 \\ \mathbb{Q}(\mathcal{N}_\gamma(x_0) \times A) = \mu_0(A) \mathbb{Q}(\mathcal{N}_\gamma(x_0) \times \mathcal{Y}) \quad \forall A \subseteq \mathcal{Y} \text{ measurable} \end{array} \right\}, \quad (\text{A.8})$$

where the last constraint defining the set  $\mathcal{B}_{x_0, \gamma}(\mathbb{B}_\rho^\infty)$  is from the dis-integration of the joint measure into a marginal distribution and the corresponding conditional distributions [8, Theorem 9.2.2].

The proof of Lemma B.3 relies on the following two results which assert the convexity of the joint ambiguity set  $\mathbb{B}_\rho^\infty$  and its induced conditional ambiguity set  $\mathcal{B}_{x_0, \gamma}(\mathbb{B}_\rho^\infty)$ .

**Lemma B.4** (Convexity of  $\mathbb{B}_\rho^\infty$ ). The ambiguity set  $\mathbb{B}_\rho^\infty$  is convex.

*Proof of Lemma B.4.* Because the nominal probability measure is an empirical measure, the ambiguity set  $\mathbb{B}_\rho^\infty$  can be represented as

$$\mathbb{B}_\rho^\infty = \left\{ \mathbb{Q} \in \mathcal{M}(\mathcal{X} \times \mathcal{Y}) : \begin{array}{l} \exists \pi_i \in \mathcal{M}(\mathcal{X} \times \mathcal{Y}) \forall i \in [N] \text{ such that :} \\ \mathbb{Q} = N^{-1} \sum_{i \in [N]} \pi_i, \quad \sum_{i \in [N]} \pi_i(\mathcal{N}_\gamma(x_0) \times \mathcal{Y}) > 0 \\ \mathbb{D}_{\mathcal{X}}(x, \hat{x}_i) + \mathbb{D}_{\mathcal{Y}}(y, \hat{y}_i) \leq \rho \quad \forall (x, y) \in \text{supp}(\pi_i) \quad \forall i \in [N] \end{array} \right\}.$$

Pick any arbitrary  $\mathbb{Q}^0$  and  $\mathbb{Q}^1$  from  $\mathbb{B}_\rho^\infty$ . Associated with  $\mathbb{Q}^j$ ,  $j \in \{0, 1\}$  is a collection of probability measures  $\{\pi_i^j\} \in \mathcal{M}(\mathcal{X} \times \mathcal{Y})^N$  satisfying

$$\begin{cases} \mathbb{Q}^j = N^{-1} \sum_{i \in [N]} \pi_i^j, \quad \sum_{i \in [N]} \pi_i^j(\mathcal{N}_\gamma(x_0) \times \mathcal{Y}) > 0 \\ \mathbb{D}_{\mathcal{X}}(x, \hat{x}_i) + \mathbb{D}_{\mathcal{Y}}(y, \hat{y}_i) \leq \rho \quad \forall (x, y) \in \text{supp}(\pi_i^j) \quad \forall i \in [N]. \end{cases}$$

Consider any convex combination  $\mathbb{Q}^\lambda = \lambda \mathbb{Q}^1 + (1 - \lambda) \mathbb{Q}^0$  for  $\lambda \in (0, 1)$ . It is easy to verify that the joint measure  $\pi_i^\lambda = \lambda \pi_i^1 + (1 - \lambda) \pi_i^0$  for any  $i \in [N]$  satisfies

$$\begin{cases} \mathbb{Q}^\lambda = N^{-1} \sum_{i \in [N]} \pi_i^\lambda, \quad \sum_{i \in [N]} \pi_i^\lambda(\mathcal{N}_\gamma(x_0) \times \mathcal{Y}) > 0 \\ \mathbb{D}_{\mathcal{X}}(x, \hat{x}_i) + \mathbb{D}_{\mathcal{Y}}(y, \hat{y}_i) \leq \rho \quad \forall (x, y) \in \text{supp}(\pi_i^\lambda) \quad \forall i \in [N], \end{cases}$$

where the last constraint is satisfied by noticing that  $\text{supp}(\pi_i^\lambda) = \text{supp}(\pi_i^0) \cup \text{supp}(\pi_i^1)$ . This observation implies that  $\mathbb{Q}^\lambda \in \mathbb{B}_\rho^\infty$ .  $\square$

**Lemma B.5** (Convexity of  $\mathcal{B}_{x_0, \gamma}(\mathbb{B}_\rho^\infty)$ ). The conditional ambiguity set  $\mathcal{B}_{x_0, \gamma}(\mathbb{B}_\rho^\infty)$  is convex.

*Proof of Lemma B.5.* Let  $\mu_0^0, \mu_0^1 \in \mathcal{B}_{x_0, \gamma}(\mathbb{B}_\rho^\infty)$  be two arbitrary probability measures. Associated with each  $\mu_0^j$ ,  $j \in \{0, 1\}$ , is a corresponding joint measure  $\mathbb{Q}^j \in \mathcal{M}(\mathcal{X} \times \mathcal{Y})$  such that

$$\mathbb{Q}^j(\mathcal{N}_\gamma(x_0) \times \mathcal{Y}) > 0 \quad \text{and} \quad \frac{\mathbb{Q}^j(\mathcal{N}_\gamma(x_0) \times A)}{\mathbb{Q}^j(\mathcal{N}_\gamma(x_0) \times \mathcal{Y})} = \mu_0^j(A).$$

Select any  $\lambda \in (0, 1)$ . We proceed to show that  $\mu_0^\lambda = \lambda \mu_0^1 + (1 - \lambda) \mu_0^0 \in \mathcal{B}_{x_0, \gamma}(\mathbb{B}_\rho^\infty)$ . Indeed, consider the joint measure

$$\mathbb{Q}^\lambda = \theta \mathbb{Q}^1 + (1 - \theta) \mathbb{Q}^0$$

with  $\theta$  being defined as

$$\theta = \frac{\lambda \mathbb{Q}^0(\mathcal{N}_\gamma(x_0) \times \mathcal{Y})}{\lambda \mathbb{Q}^0(\mathcal{N}_\gamma(x_0) \times \mathcal{Y}) + (1 - \lambda) \mathbb{Q}^1(\mathcal{N}_\gamma(x_0) \times \mathcal{Y})} \in [0, 1].$$

By definition, we have  $\mathbb{Q}^\lambda(\mathcal{N}_\gamma(x_0) \times \mathcal{Y}) > 0$ , and by convexity of  $\mathbb{B}_\rho^\infty$  from Lemma B.4, we have  $\mathbb{Q}^\lambda \in \mathbb{B}_\rho^\infty$ . Moreover, we have

$$\begin{aligned} \frac{\mathbb{Q}^\lambda(\mathcal{N}_\gamma(x_0) \times A)}{\mathbb{Q}^\lambda(\mathcal{N}_\gamma(x_0) \times \mathcal{Y})} &= \frac{\theta \mathbb{Q}^1(\mathcal{N}_\gamma(x_0) \times A) + (1 - \theta) \mathbb{Q}^0(\mathcal{N}_\gamma(x_0) \times A)}{\theta \mathbb{Q}^1(\mathcal{N}_\gamma(x_0) \times \mathcal{Y}) + (1 - \theta) \mathbb{Q}^0(\mathcal{N}_\gamma(x_0) \times \mathcal{Y})} \\ &= \frac{\lambda \mathbb{Q}^0(\mathcal{N}_\gamma(x_0) \times \mathcal{Y}) \mathbb{Q}^1(\mathcal{N}_\gamma(x_0) \times A) + (1 - \lambda) \mathbb{Q}^1(\mathcal{N}_\gamma(x_0) \times \mathcal{Y}) \mathbb{Q}^0(\mathcal{N}_\gamma(x_0) \times A)}{\mathbb{Q}^0(\mathcal{N}_\gamma(x_0) \times \mathcal{Y}) \mathbb{Q}^1(\mathcal{N}_\gamma(x_0) \times \mathcal{Y})} \\ &= \frac{\lambda \mathbb{Q}^1(\mathcal{N}_\gamma(x_0) \times A)}{\mathbb{Q}^1(\mathcal{N}_\gamma(x_0) \times \mathcal{Y})} + \frac{(1 - \lambda) \mathbb{Q}^0(\mathcal{N}_\gamma(x_0) \times A)}{\mathbb{Q}^0(\mathcal{N}_\gamma(x_0) \times \mathcal{Y})} \\ &= \lambda \mu_0^1(A) + (1 - \lambda) \mu_0^0(A), \end{aligned}$$

where the second equality follows from the definition of  $\theta$ . This implies that  $\mu_0^\lambda \in \mathcal{B}_{x_0, \gamma}(\mathbb{B}_\rho^\infty)$ , and further implies the convexity of  $\mathcal{B}_{x_0, \gamma}(\mathbb{B}_\rho^\infty)$ .  $\square$

178 We are now ready to prove Lemma B.3.

179 *Proof of Lemma B.3.* By the definition of the conditional ambiguity set  $\mathcal{B}_{x_0, \gamma}(\mathbb{B}_\rho^\infty)$ , it suffices to  
 180 prove the equivalence

$$\min_{\beta \in \mathbb{R}^m} \sup_{\mu_0 \in \mathcal{B}_{x_0, \gamma}(\mathbb{B}_\rho^\infty)} \mathbb{E}_{\mu_0}[\ell(Y, \beta)] = \sup_{\mu_0 \in \mathcal{B}_{x_0, \gamma}(\mathbb{B}_\rho^\infty)} \min_{\beta \in \mathbb{R}^m} \mathbb{E}_{\mu_0}[\ell(Y, \beta)].$$

181 First, consider the mapping  $\beta \mapsto \sup_{\mu_0 \in \mathcal{B}_{x_0, \gamma}(\mathbb{B}_\rho^\infty)} \mathbb{E}_{\mu_0}[\ell(Y, \beta)]$ . The properties of  $\ell$  implies that  
 182 this mapping is lower semi-continuous and coercive. As a consequence, without loss of optimality,  
 183 we can restrict the feasible set  $\beta$  to some convex, compact ball  $\mathcal{S} \triangleq \{\beta : \|\beta\|_2 \leq R\}$  for some radius  
 184  $R \in \mathbb{R}_{++}$  sufficiently big.

185 We now consider the mapping  $\mu_0 \mapsto \mathbb{E}_{\mu_0}[\ell(Y, \beta)]$  parametrized by  $\beta$ . For any  $\beta$ , it is a linear function  
 186 of  $\mu_0$ , and hence it is concave. It is also weakly continuous. To see this, notice that when  $\mathbb{D}(\cdot, \hat{y})$  is  
 187 coercive, the set

$$\mathcal{A} \triangleq \bigcup_{i \in [N]} \{y : \mathbb{D}_{\mathcal{Y}}(y, \hat{y}_i) \leq \rho\},$$

188 being a finite union of bounded sets, is bounded. Pick any  $\mathbb{Q} \in \mathbb{B}_\rho^\infty$ , by the definition of the type- $\infty$   
 189 Wasserstein distance, we have  $\mathbb{Q}(\mathcal{A}) = 1$ . Consider the conditional measure  $\mu_0^\mathbb{Q}$  induced by  $\mathbb{Q}$ , then  
 190 we have

$$\mu_0^\mathbb{Q}(\mathcal{A} \cap \mathcal{Y}) = \frac{\mathbb{Q}(\mathcal{N}_\gamma(x_0) \times (\mathcal{A} \cap \mathcal{Y}))}{\mathbb{Q}(\mathcal{N}_\gamma(x_0) \times \mathcal{Y})} \geq \frac{\mathbb{Q}(\mathcal{N}_\gamma(x_0) \times (\mathcal{A} \cap \mathcal{Y}))}{\mathbb{Q}(\mathcal{N}_\gamma(x_0) \times (\mathcal{A} \cap \mathcal{Y}))} = 1,$$

191 which implies that  $\mu_0^\mathbb{Q}$  has a bounded support. This implies that  $\mathcal{B}_{x_0, \gamma}(\mathbb{B}_\rho^\infty) \subseteq \mathcal{M}(\mathcal{A})$ , where  $\mathcal{M}(\mathcal{A})$   
 192 is the set of all probability measures supported on a bounded set  $\mathcal{A}$ . Because  $\ell(\cdot, \beta)$  is continuous,  
 193 there exists a bound  $U \in \mathbb{R}_{++}$  such that  $|\ell(y, \beta)| \leq U$  for every  $y \in \mathcal{A}$ . Define now the function  
 194  $\ell_U(\cdot, \beta) = \max\{-U, \min\{\ell(\cdot, \beta), U\}\}$ , which is continuous and bounded. Consider any sequence  
 195 of conditional measures  $\{\mu_0^k\} \in \mathcal{M}(\mathcal{A})$  that weakly converges to  $\mu_0^\infty$ , we have

$$\lim_{k \uparrow \infty} \mathbb{E}_{\mu_0^k}[\ell(Y, \beta)] = \lim_{k \uparrow \infty} \mathbb{E}_{\mu_0^k}[\ell_U(Y, \beta)] = \mathbb{E}_{\mu_0^\infty}[\ell_U(Y, \beta)] = \mathbb{E}_{\mu_0^\infty}[\ell(Y, \beta)],$$

196 which implies that the function  $\mu_0 \mapsto \mathbb{E}_{\mu_0}[\ell(Y, \beta)]$  is weakly continuous over  $\mathcal{M}(\mathcal{A})$ .

197 This line of argument suggests that

$$\begin{aligned} \min_{\beta} \sup_{\mu_0 \in \mathcal{B}_{x_0, \gamma}(\mathbb{B}_\rho^\infty)} \mathbb{E}_{\mu_0}[\ell(Y, \beta)] &= \min_{\beta: \|\beta\|_2 \leq R} \sup_{\mu_0 \in \mathcal{B}_{x_0, \gamma}(\mathbb{B}_\rho^\infty)} \mathbb{E}_{\mu_0}[\ell(Y, \beta)] \\ &= \sup_{\mu_0 \in \mathcal{B}_{x_0, \gamma}(\mathbb{B}_\rho^\infty)} \min_{\beta: \|\beta\|_2 \leq R} \mathbb{E}_{\mu_0}[\ell(Y, \beta)] \end{aligned} \quad (\text{A.9a})$$

$$= \sup_{\mu_0 \in \mathcal{B}_{x_0, \gamma}(\mathbb{B}_\rho^\infty)} \min_{\beta} \mathbb{E}_{\mu_0}[\ell(Y, \beta)], \quad (\text{A.9b})$$

198 where equality (A.9b) follows from the coercivity of the loss function, thus the constraint on  $\beta$  can be  
 199 dropped for  $R$  sufficiently big. Equality (A.9a) holds by Sion's minimax theorem [7]. This finishes  
 200 the proof.  $\square$

201 *Proof of Proposition 3.4.* Because the loss function is coercive and convex in  $\beta$ , we have

$$\begin{aligned} \min_{\beta \in \mathbb{R}} \sup_{\mu_0 \in \mathcal{B}_{x_0, \gamma}(\mathbb{B}_\rho^\infty)} \mathbb{E}_{\mu_0}[(Y - \beta)^2] &= \sup_{\mu_0 \in \mathcal{B}_{x_0, \gamma}(\mathbb{B}_\rho^\infty)} \min_{\beta \in \mathbb{R}} \mathbb{E}_{\mu_0}[(Y - \beta)^2] \\ &= \sup_{\mu_0 \in \mathcal{B}_{x_0, \gamma}(\mathbb{B}_\rho^\infty)} \mathbb{E}_{\mu_0}[(Y - \mathbb{E}_{\mu_0}[Y])^2] \\ &= \text{Variance}_{\mu_0^*}(Y), \end{aligned}$$

202 where the first equality follows from Lemma B.3, the second equality follows from the fact that for  
 203 any  $\mu_0 \in \mathcal{B}_{x_0, \gamma}(\mathbb{B}_\rho^\infty)$ , the estimate  $\beta^*(\mu_0) = \mathbb{E}_{\mu_0}[Y]$  minimizes the objective  $\mathbb{E}_{\mu_0}[(Y - \beta)^2]$ . The  
 204 last equality follows from the definition of  $\mu_0^*$ .

205 Let  $\beta^*$  be the optimal estimate that solves (2), we now have

$$\begin{aligned}\text{Variance}_{\mu_0^*}(Y) &= \sup_{\mu_0 \in \mathcal{B}_{x_0, \gamma}(\mathbb{B}_\rho^\infty)} \mathbb{E}_{\mu_0}[(Y - \beta^*)^2] \\ &\geq \mathbb{E}_{\mu_0^*}[(Y - \beta^*)^2] = \text{Variance}_{\mu_0^*}(Y) + (\beta^* - \mathbb{E}_{\mu_0^*}[Y])^2,\end{aligned}$$

206 where the last equality follows from the bias-variance decomposition. This implies that  $\beta^* = \mathbb{E}_{\mu_0^*}[Y]$   
207 and completes the proof.  $\square$

## 208 C Golden-section Search for Univariate Conditional Estimate

209 We elaborate here on the procedure of applying a golden-section search to solve a one-dimensional  
210 local conditional estimation with a convex loss function  $\ell$ . We suppose that  $\mathcal{Y} = [a, b]$  for some finite  
211 values  $-\infty < a < b < \infty$ , that  $\ell(y, \cdot)$  is convex for every  $y$  and that we have access to an oracle  
212 that solves (5). Given any  $\beta$ , the worst-case conditional expected loss  $f(\beta)$  can be computed using  
213 Theorem 2.3. Algorithm 1 can be used to find the optimal conditional estimate  $\beta^*$  to any arbitrary  
214 precision.

---

### Algorithm 1 Golden-section Search Algorithm

---

**Input:** Range  $[a, b] \in \mathbb{R}$ , tolerance  $\epsilon \in \mathbb{R}_{++}$   
**Initialization:** Set  $r \leftarrow 0.618$ ,  $\beta_1 \leftarrow a$ ,  $\beta_4 \leftarrow b$   
**while**  $|\beta_4 - \beta_1| > \epsilon$  **do**  
    Set  $\beta_2 \leftarrow r\beta_1 + (1-r)\beta_4$ ,  $\beta_3 \leftarrow (1-r)\beta_1 + r\beta_4$   
    **if**  $f(\beta_2) \leq f(\beta_3)$  **then** Set  $\beta_4 \leftarrow \beta_3$  **else** Set  $\beta_1 \leftarrow \beta_2$  **endif**  
**end while**  
Set  $\beta^* \leftarrow (\beta_1 + \beta_4)/2$   
**Output:**  $\beta^*$

---

## 215 References

- 216 [1] C. D. Aliprantis and K. C. Border. *Infinite Dimensional Analysis: A Hitchhiker's Guide*. Springer,  
217 2006.
- 218 [2] F. Alizadeh and D. Goldfarb. Second-order cone programming. *Mathematical Programming*,  
219 95:3–51, 2003.
- 220 [3] D. P. Bertsekas. *Control of Uncertain Systems with a Set-Membership Description of Uncertainty*.  
221 PhD thesis, Massachusetts Institute of Technology, 1971.
- 222 [4] A. Charnes and W. W. Cooper. Programming with linear fractional functionals. *Naval Research*  
223 *Logistics Quarterly*, 9(3-4):181–186, 1962.
- 224 [5] N. García Trillos and D. Slepčev. On the rate of convergence of empirical measures in  $\infty$ -  
225 transportation distance. *Canadian Journal of Mathematics*, 67(6):1358–1383, 2015.
- 226 [6] S. Kruk and H. Wolkowicz. Pseudolinear programming. *SIAM Review*, 41(4):795–805, 1999.
- 227 [7] M. Sion. On general minimax theorems. *Pacific Journal of Mathematics*, 8(1):171–176, 1958.
- 228 [8] D. Stroock. *Probability Theory: An Analytic View*. Cambridge University Press, 2011.

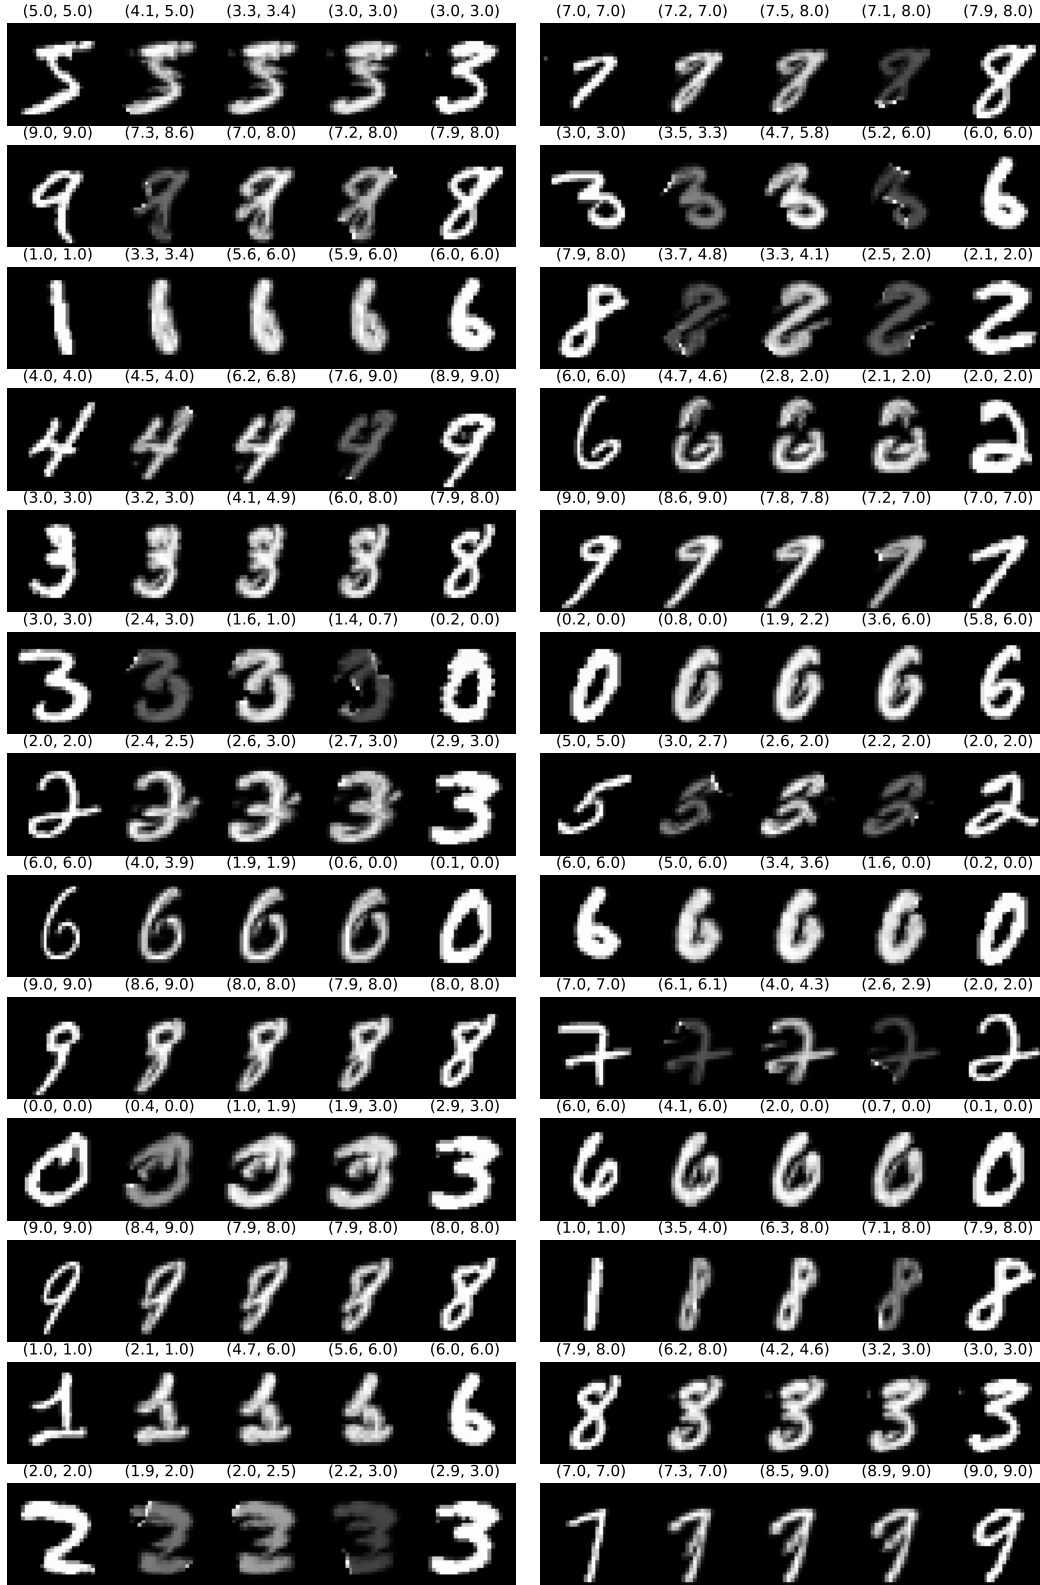

Figure A.4: Comparison of estimations from N-W and DRCME on entropic regularized Wasserstein barycenters of pairs of images from the training set. Estimations are presented above each image in the format “(N-W, DRCME)”.

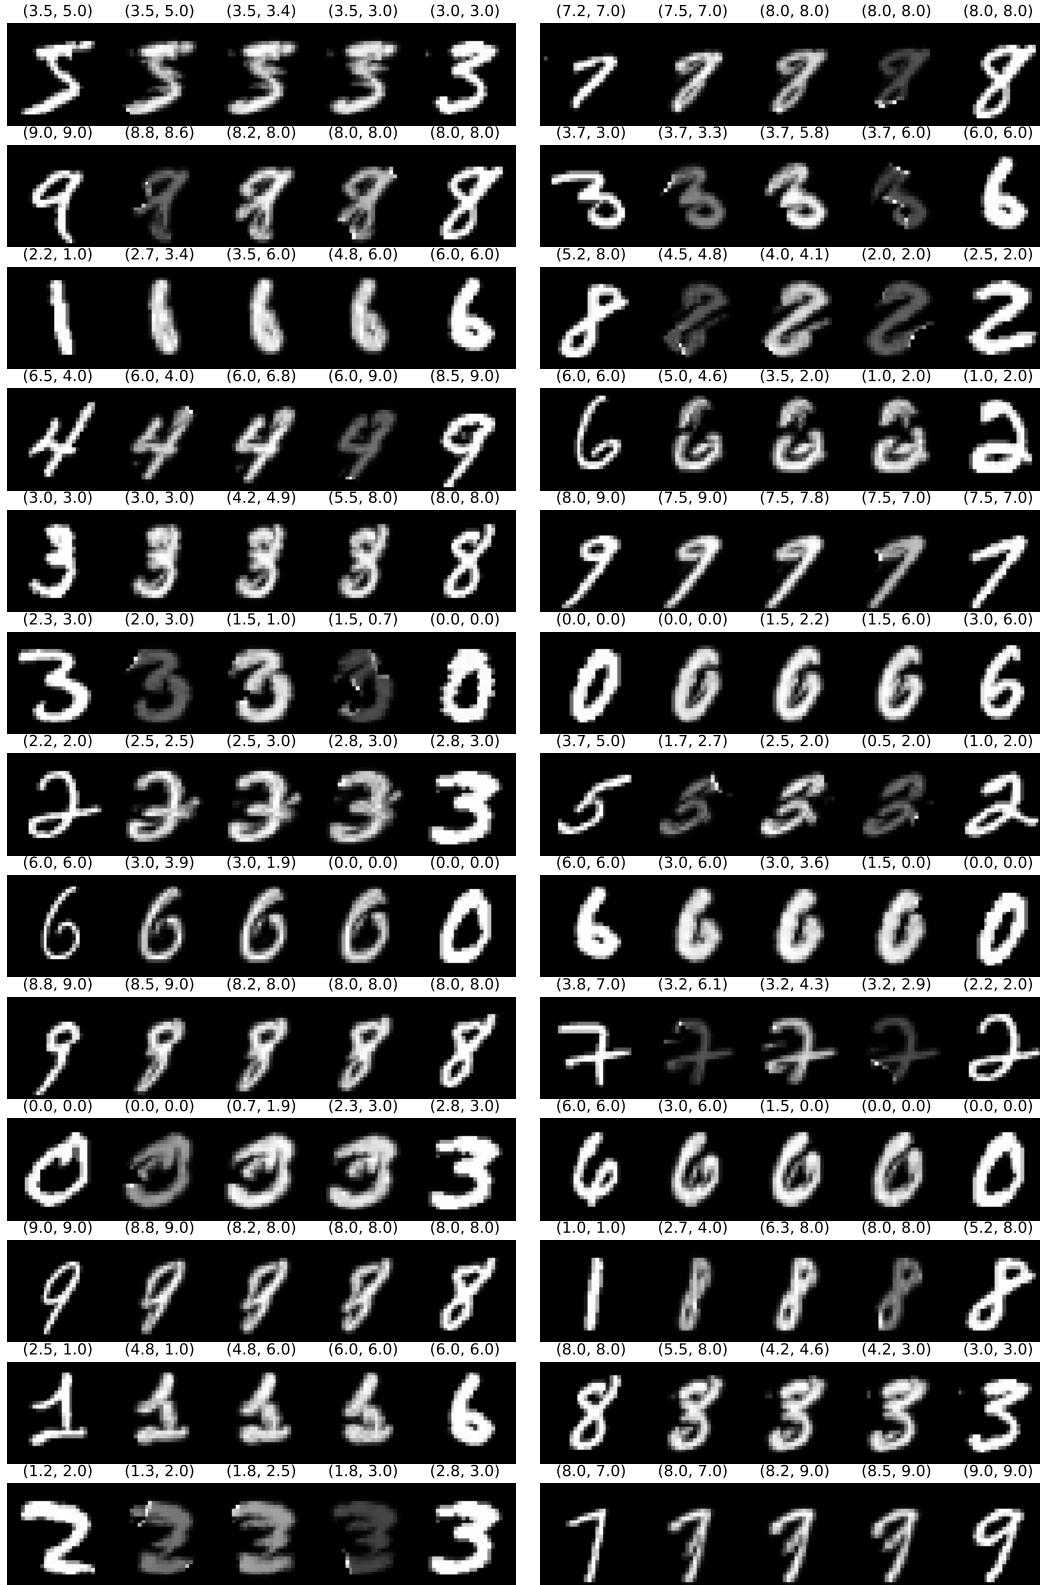

Figure A.5: Comparison of estimations from BertEtAl and DRCME on entropic regularized Wasserstein barycenters of pairs of images from the training set. Estimations are presented above each image in the format “(BertEtAl, DRCME)”.
